# Supplementary material for: Ocular Dominance and Functional Asymmetry in Visual Attention Networks
Source: PubMed Central journal article supplement — Invest Ophthalmol Vis Sci. 2021 Apr 7;62(4):9. doi: 10.1167/iovs.62.4.9 (PMC8039471; doi:10.1167/iovs.62.4.9), 2021-04-07
Supplement: iovs-62-4-9_s001.pdf [file iovs-62-4-9_s001.pdf]

**Supplementary Table 1**

The statical power and effect sizes obtained in the present study using G\*Power 3.1.9.7.

| <b>Results</b>   | <b>ROI</b>         | <b>Statistical measures</b>       | <b>Statistical power</b>      | <b>Effect sizes</b> |
|------------------|--------------------|-----------------------------------|-------------------------------|---------------------|
| Behavior Results |                    |                                   |                               |                     |
| Reaction time    | N/A                | stimulus size main effect         | 1.000                         | 0.775               |
|                  |                    | ocular dominance in 5-degrees     | 0.342                         | 0.146               |
|                  |                    | ocular dominance in 20-degrees    | 0.770                         | 0.255               |
|                  |                    | ocular dominance in 30-degrees    | 0.117                         | 0.071               |
| Accuracy rates   | N/A                | stimulus size main effect         | 1.000                         | 0.944               |
|                  |                    | ocular dominance in 5-degrees     | 1.000                         | 0.763               |
|                  |                    | ocular dominance in 20-degrees    | 0.999                         | 0.616               |
|                  |                    | ocular dominance in 30-degrees    | 0.999                         | 0.594               |
| ERO Results      |                    |                                   |                               |                     |
| Theta power      | VAN anterior area  | ocular dominance in 5-degrees     | 0.999                         | 0.616               |
|                  |                    | stimulus size in dominant eye     | 1.000                         | 0.664               |
|                  | VAN posterior area | stimulus size in dominant eye     | 1.000                         | 0.710               |
|                  |                    | stimulus size in non-dominant eye | 0.999                         | 0.543               |
| Low alpha power  | VAN anterior area  | stimulus size in dominant eye     | 0.998                         | 0.407               |
|                  |                    | ocular dominance in 20-degrees    | 0.999                         | 0.481               |
|                  | VAN posterior area | stimulus size in dominant eye     | 1.000                         | 0.708               |
|                  |                    | DAN anterior area                 | stimulus size in dominant eye | 0.999               |
| High alpha power | VAN posterior area | stimulus size in non-dominant eye | 0.995                         | 0.375               |
| Low beta power   | VAN anterior area  | ocular dominance in 5-degrees     | 0.997                         | 0.445               |
|                  |                    | ocular dominance in 30-degrees    | 0.993                         | 0.417               |
|                  | DAN anterior area  | ocular dominance in 5-degrees     | 0.999                         | 0.530               |
| SPLV Results     |                    |                                   |                               |                     |
| Theta SPLV       | Left VAN           | ocular dominance in 5-degrees     | 0.999                         | 0.537               |
|                  | Right VAN          | ocular dominance in 5-degrees     | 0.999                         | 0.469               |

|                 |           |                                |       |       |
|-----------------|-----------|--------------------------------|-------|-------|
|                 | Left DAN  | ocular dominance in 30-degrees | 0.989 | 0.402 |
|                 | Right DAN | ocular dominance in 20-degrees | 0.998 | 0.462 |
|                 |           | ocular dominance in 30-degrees | 0.995 | 0.430 |
| Low alpha SPLV  | Left DAN  | ocular dominance in 30-degrees | 0.986 | 0.393 |
| High alpha SPLV | Left DAN  | ocular dominance in 30-degrees | 0.999 | 0.492 |

---

ROI, region of interest, ERO, event-related oscillation, SPLV, standardized phase-locking value.

**Supplementary Table 2**

The mean value and comparisons of phase-locked power in theta, alpha and beta band under the target and the standard condition.

| Frequency bands | ROI                | Target condition | Standard condition | F      | P value | Partial $\eta^2$ |
|-----------------|--------------------|------------------|--------------------|--------|---------|------------------|
|                 |                    | Mean (S.D.)      | Mean (S.D.)        |        |         |                  |
| Theta band      | DAN anterior area  | 4.08 (0.30)      | 2.61 (0.12)        | 19.272 | 0.000   | 0.246            |
|                 | DAN posterior area | 3.82 (0.23)      | 2.38 (0.15)        | 29.478 | 0.000   | 0.333            |
|                 | VAN anterior area  | 4.13 (0.37)      | 3.27 (0.21)        | 4.423  | 0.040   | 0.070            |
|                 | VAN posterior area | 3.96 (0.16)      | 3.26 (0.18)        | 12.552 | 0.001   | 0.175            |
| Low alpha band  | DAN anterior area  | 4.64 (0.60)      | 3.24 (0.30)        | 4.591  | 0.036   | 0.072            |
|                 | DAN posterior area | 4.90 (0.52)      | 3.11 (0.32)        | 12.549 | 0.001   | 0.175            |
|                 | VAN anterior area  | 6.44 (0.78)      | 4.16 (0.46)        | 9.184  | 0.004   | 0.135            |
|                 | VAN posterior area | 6.50 (0.76)      | 4.84 (0.39)        | 4.138  | 0.046   | 0.066            |
| High alpha band | DAN anterior area  | 3.72 (0.57)      | 2.48 (0.25)        | 4.017  | 0.050   | 0.064            |
|                 | DAN posterior area | 2.95 (0.37)      | 2.58 (0.26)        | 0.845  | 0.362   | 0.014            |
|                 | VAN anterior area  | 4.34 (0.66)      | 2.36 (0.19)        | 8.375  | 0.005   | 0.124            |
|                 | VAN posterior area | 3.67 (0.48)      | 2.64 (0.21)        | 4.592  | 0.036   | 0.072            |
| Low beta band   | DAN anterior area  | 3.23 (0.28)      | 2.65 (0.23)        | 3.499  | 0.066   | 0.056            |
|                 | DAN posterior area | 2.86 (0.29)      | 2.27 (0.17)        | 3.582  | 0.063   | 0.057            |
|                 | VAN anterior area  | 3.49 (0.37)      | 2.58 (0.23)        | 3.804  | 0.056   | 0.061            |
|                 | VAN posterior area | 4.03 (0.50)      | 2.49 (0.20)        | 7.318  | 0.009   | 0.110            |
| High beta band  | DAN anterior area  | 2.80 (0.29)      | 2.34 (0.28)        | 2.734  | 0.104   | 0.044            |
|                 | DAN posterior area | 2.35 (0.34)      | 1.83 (0.14)        | 2.319  | 0.133   | 0.038            |
|                 | VAN anterior area  | 2.73 (0.31)      | 2.18 (0.19)        | 3.707  | 0.059   | 0.059            |
|                 | VAN posterior area | 2.58 (0.25)      | 1.91 (0.16)        | 5.651  | 0.021   | 0.087            |

ROI, region of interest, DAN, dorsal attention network, VAN, ventral attention network, S.D., standard deviation.
